# Supplementary material for: Validation of an AI-based solution for breast cancer risk stratification using routine digital histopathology images
Source: bioRxiv or medRxiv preprint supplement (doi:10.1101/2023.10.10.23296761), 2024-07-02
Supplement: Supplementary file [file media-1.pdf]

# **Validation of an AI-based solution for breast cancer risk stratification using routine digital histopathology images**

Abhinav Sharma<sup>1</sup>, Sandy Kang Lövgren<sup>5</sup>, Kajsa Ledesma Eriksson<sup>5</sup>, Yinxu Wang<sup>5</sup>, Stephanie Robertson<sup>2</sup>, Johan Hartman<sup>2,3,4</sup>, Mattias Rantalainen<sup>1,4</sup>

<sup>1</sup>. Department of Medical Epidemiology and Biostatistics, Karolinska Institutet, Stockholm, Sweden

<sup>2</sup>. Department of Oncology-Pathology, Karolinska Institutet, Stockholm, Sweden

<sup>3</sup>. Department of Clinical Pathology and Cancer Diagnostics, Karolinska University Hospital, Stockholm, Sweden

<sup>4</sup>. MedTechLabs, BioClinicum, Karolinska University Hospital, Solna, Sweden

<sup>5</sup>. Stratipath AB, Solna, Sweden

**Corresponding author:** Mattias Rantalainen

**Email:** mattias.rantalainen@ki.se

**Table 1:** Baseline characteristics of the cohorts from two different hospitals in Sweden.

|                          | <b>CHIME breast KS<br/>Solna<br/>(N=1542)</b> | <b>SCAN-B<br/>(N=933)</b> | <b>Overall<br/>(N=2475)</b> |
|--------------------------|-----------------------------------------------|---------------------------|-----------------------------|
| <b>Age</b>               |                                               |                           |                             |
| Mean (SD)                | 61.6 (12.3)                                   | 65.5 (12.3)               | 63.0 (12.5)                 |
| Median [Min, Max]        | 63.0 [29.0, 94.0]                             | 70.0 [30.0, 95.0]         | 65.0 [29.0, 95.0]           |
| <b>Tumor size</b>        |                                               |                           |                             |
| <20mm                    | 1043 (67.6%)                                  | 620 (66.5%)               | 1663 (67.2%)                |
| >=20mm                   | 486 (31.5%)                                   | 302 (32.4%)               | 788 (31.8%)                 |
| Missing                  | 13 (0.8%)                                     | 11 (1.2%)                 | 24 (1.0%)                   |
| <b>Lymph node status</b> |                                               |                           |                             |
| Negative                 | 1105 (71.7%)                                  | 646 (69.2%)               | 1751 (70.7%)                |
| Positive                 | 311 (20.2%)                                   | 260 (27.9%)               | 571 (23.1%)                 |
| Missing                  | 126 (8.2%)                                    | 27 (2.9%)                 | 153 (6.2%)                  |
| <b>NHG</b>               |                                               |                           |                             |
| 1                        | 302 (19.6%)                                   | 170 (18.2%)               | 472 (19.1%)                 |
| 2                        | 894 (58.0%)                                   | 527 (56.5%)               | 1421 (57.4%)                |
| 3                        | 346 (22.4%)                                   | 236 (25.3%)               | 582 (23.5%)                 |
| <b>ER status</b>         |                                               |                           |                             |
| Negative                 | 165 (10.7%)                                   | 87 (9.3%)                 | 252 (10.2%)                 |
| Positive                 | 1370 (88.8%)                                  | 842 (90.2%)               | 2212 (89.4%)                |
| Missing                  | 7 (0.5%)                                      | 4 (0.4%)                  | 11 (0.4%)                   |
| <b>HER2 status</b>       |                                               |                           |                             |
| Negative                 | 1349 (87.5%)                                  | 850 (91.1%)               | 2199 (88.8%)                |
| Positive                 | 151 (9.8%)                                    | 70 (7.5%)                 | 221 (8.9%)                  |
| Missing                  | 42 (2.7%)                                     | 13 (1.4%)                 | 55 (2.2%)                   |
| <b>PFS (in years)</b>    |                                               |                           |                             |
| Mean (SD)                | 6.27 (2.53)                                   | 5.24 (2.24)               | 5.88 (2.47)                 |
| Median [Min, Max]        | 6.49 [0.153, 10.8]                            | 5.23 [0.115, 10.2]        | 6.00 [0.115, 10.8]          |
| <b>PFS status</b>        |                                               |                           |                             |

|   |              |             |              |
|---|--------------|-------------|--------------|
| 0 | 1461 (94.7%) | 902 (96.7%) | 2363 (95.5%) |
| 1 | 81 (5.3%)    | 31 (3.3%)   | 112 (4.5%)   |

---

NHG=Nottingham histological grade, ER=oestrogen receptor, HER2=human epidermal growth factor receptor 2, PFS = Progression-free Survival.
